# Supplementary material for: Barriers to and facilitators of the implementation of pharmacist services in primary care clinics: a scoping review protocol
Source: HighWire-hosted journal article supplement (doi:10.1136/bmjopen-2021-057191), 2022-01-01
Supplement: bmjopen-2021-057191supp002_data_supplement.pdf [file bmjopen-2021-057191supp002_data_supplement.pdf]

## Online Supplementary File 2 Search Terms

| PubMed                                                                                                                                                                                                                                                                                                                                                                                                                                                                                                                                                                                                                                                                                                                                                                                                                                                                                                                                                                                                                                                                                                                                                                                                                                                                                                                                                                                                                                                                                                                                                                                                                                                                                                                                                                                                                                                                                                                                                                                                                                                                                                                                                                                                                                                                                                                                                                |
|-----------------------------------------------------------------------------------------------------------------------------------------------------------------------------------------------------------------------------------------------------------------------------------------------------------------------------------------------------------------------------------------------------------------------------------------------------------------------------------------------------------------------------------------------------------------------------------------------------------------------------------------------------------------------------------------------------------------------------------------------------------------------------------------------------------------------------------------------------------------------------------------------------------------------------------------------------------------------------------------------------------------------------------------------------------------------------------------------------------------------------------------------------------------------------------------------------------------------------------------------------------------------------------------------------------------------------------------------------------------------------------------------------------------------------------------------------------------------------------------------------------------------------------------------------------------------------------------------------------------------------------------------------------------------------------------------------------------------------------------------------------------------------------------------------------------------------------------------------------------------------------------------------------------------------------------------------------------------------------------------------------------------------------------------------------------------------------------------------------------------------------------------------------------------------------------------------------------------------------------------------------------------------------------------------------------------------------------------------------------------|
| <p>(((((((((((Pharmacists[MeSH Terms]) OR (pharmacy technicians[MeSH Terms])) OR (Pharmacists[Title/Abstract])) OR (pharmacy technicians[Title/Abstract])) OR (pharmac* technician[Title/Abstract])) OR (pharmacist*[Title/Abstract])) OR (clinic* pharmacist*[Title/Abstract])) OR (pharmac* staff[Title/Abstract])) OR (pharmacist*[Title/Abstract])) OR (druggist*[Title/Abstract])) OR (apothecary*[Title/Abstract])) OR (hospital pharmacist*[Title/Abstract])) OR (assistant pharmacist*[Title/Abstract])) OR (commun* pharmacist*[Title/Abstract]))</p> <p>AND</p> <p>(((((((((((Primary health care[MeSH Terms]) OR (Pharmaceutical services[MeSH Terms])) OR (Primary health care[Title/Abstract])) OR (pharmaceutical services[Title/Abstract])) OR (pharmac* servic*[Title/Abstract])) OR (pharmac* car*[Title/Abstract])) OR (pharmacist-managed clinic*[Title/Abstract])) OR (pharmac* clinic for outpatient*[Title/Abstract])) OR (Pharmac* clinic*[Title/Abstract])) OR (outpatient pharmac* servic*[Title/Abstract]))</p> <p>AND</p> <p>((((((((((((((((Hospitals, community[MeSH Terms]) OR (Community health services[MeSH Terms])) OR (community health centers[MeSH Terms])) OR (Community health centers[Title/Abstract])) OR (community health services[Title/Abstract])) OR (primary care clinic*[Title/Abstract])) OR (pharmacist-managed clinic*[Title/Abstract])) OR (Community health servic*[Title/Abstract])) OR (commun* health center*[Title/Abstract])) OR (commun* hospital*[Title/Abstract])) OR (general practice*[Title/Abstract])) OR (community care setting*[Title/Abstract])) OR (primary care setting*[Title/Abstract])) OR (ambulatory care setting*[Title/Abstract])) OR (family practice*[Title/Abstract])) OR (clinic*[Title/Abstract])) OR (medication review clinic*[Title/Abstract]))</p> <p>AND</p> <p>(((((((Facilitator*[Title/Abstract]) OR (Barrier*[Title/Abstract])) OR (restrict*[Title/Abstract])) OR (limit*[Title/Abstract])) OR (difficult*[Title/Abstract])) OR (factor*[Title/Abstract])) OR (promot*[Title/Abstract])) OR (ease[Title/Abstract]))</p> <p>AND</p> <p>("qualitative research"[MeSH Terms] OR ("qualitative"[All Fields] AND "research"[All Fields]) OR "qualitative research"[All Fields] OR ("qualitative"[All Fields] AND "study"[All Fields]) OR "qualitative study"[All Fields])</p> |

| Embase                                                                                                                                                                                                                                                                                                                                                                                                                                                                                                                                                          |
|-----------------------------------------------------------------------------------------------------------------------------------------------------------------------------------------------------------------------------------------------------------------------------------------------------------------------------------------------------------------------------------------------------------------------------------------------------------------------------------------------------------------------------------------------------------------|
| ('pharmacist'/exp OR 'pharmacist' OR 'pharmacy technician'/exp OR 'pharmacy technician' OR 'pharmacy technicians':ab,ti OR 'pharmac* technician':ab,ti OR 'pharmacist*':ab,ti OR 'clinic* pharmacist*':ab,ti OR 'pharmac* staff':ab,ti OR 'pharmaceutist*':ab,ti OR 'druggist*':ab,ti OR 'apothecary*':ab,ti OR 'hospital pharmacist*':ab,ti OR 'assistant pharmacist*':ab,ti OR 'commun* pharmacist*':ab,ti)                                                                                                                                                   |
| AND                                                                                                                                                                                                                                                                                                                                                                                                                                                                                                                                                             |
| ('primary medical care'/exp OR 'primary health care'/exp OR 'pharmacy (shop)'/exp OR 'primary health care':ab,ti OR 'pharmaceutical services':ab,ti OR 'pharmac* servic*':ab,ti OR 'pharmac* car*':ab,ti OR 'pharmacist-managed clinic*':ab,ti OR 'pharmac* clinic for outpatient*':ab,ti OR 'pharmac* clinic*':ab,ti OR 'outpatient pharmac* servic*':ab,ti)                                                                                                                                                                                                   |
| AND                                                                                                                                                                                                                                                                                                                                                                                                                                                                                                                                                             |
| ('community care'/exp OR 'community care' OR 'health center'/exp OR 'health center' OR 'community health centers':ab,ti OR 'community health services':ab,ti OR 'primary care clinic*':ab,ti OR 'pharmacist-managed clinic*':ab,ti OR 'community health servic*':ab,ti OR 'commun* health center*':ab,ti OR 'commun* hospital*':ab,ti OR 'general practice*':ab,ti OR 'community care setting*':ab,ti OR 'primary care setting*':ab,ti OR 'ambulatory care setting*':ab,ti OR 'family practice*':ab,ti OR 'clinic*':ab,ti OR 'medication review clinic*':ab,ti) |
| AND                                                                                                                                                                                                                                                                                                                                                                                                                                                                                                                                                             |
| (facilitator*':ab,ti OR barrier*':ab,ti OR restrict*':ab,ti OR limit*':ab,ti OR difficult*':ab,ti OR factor*':ab,ti OR promot*':ab,ti OR ease:ab,ti)                                                                                                                                                                                                                                                                                                                                                                                                            |
| AND                                                                                                                                                                                                                                                                                                                                                                                                                                                                                                                                                             |
| ('qualitative research'/exp OR 'qualitative research' OR (('qualitative'/exp OR qualitative) AND ('research'/exp OR research)))                                                                                                                                                                                                                                                                                                                                                                                                                                 |

**Scopus**

(TITLE-ABS-KEY("Pharmacists" OR "pharmacy technicians" OR "pharmac\* technician" OR "pharmacist\*" OR "clinic\*" "pharmacist\*" OR "pharmac\* staff" OR "pharmacist\*" OR "druggist\*" OR "apothecary\*" OR "hospital pharmacist\*" OR "assistant pharmacist\*" OR "commun\* pharmacist\*") AND SUBJAREA(MULT OR MEDI OR NURS OR VETE OR DENT OR HEAL OR PSYC OR SOCI)) AND (TITLE-ABS-KEY("Primary health care" OR "pharmaceutical services" OR "pharmac\* servic\*" OR "pharmac\* car\*" OR "pharmacist-managed clinic\*" OR "pharmac\* clinic for outpatient\*" OR "Pharmac\* clinic\*" OR "outpatient pharmac\* servic\*") AND SUBJAREA(MULT OR MEDI OR NURS OR VETE OR DENT OR HEAL OR PSYC OR SOCI)) AND (TITLE-ABS-KEY("Community health centers" OR "community health services" OR "primary care clinic\*" OR "pharmacist-managed clinic\*" OR "Community health servic\*" OR "commun\* health center\*" OR "commun\* hospital\*" OR "general practice\*" OR "community care setting\*" OR "primary care setting\*" OR "ambulatory care setting\*" OR "family practice\*" OR "clinic\*" OR "medication review clinic\*") AND SUBJAREA(MULT OR MEDI OR NURS OR VETE OR DENT OR HEAL OR PSYC OR SOCI)) AND (TITLE-ABS-KEY("Facilitator\*" OR "Barrier\*" OR "restrict\*" OR "limit\*" OR "difficult\*" OR "factor\*" OR "promot\*" OR "ease") AND SUBJAREA(MULT OR MEDI OR NURS OR VETE OR DENT OR HEAL OR PSYC OR SOCI)) AND (TITLE-ABS-KEY("qualitative research" OR "qualitative study") AND SUBJAREA(MULT OR MEDI OR NURS OR VETE OR DENT OR HEAL OR PSYC OR SOCI))

| CINAHL                                                                                                                                                                                                                                                                                                                                                                                                                                                                                                                                                                                                                                                                                                                                                                               |
|--------------------------------------------------------------------------------------------------------------------------------------------------------------------------------------------------------------------------------------------------------------------------------------------------------------------------------------------------------------------------------------------------------------------------------------------------------------------------------------------------------------------------------------------------------------------------------------------------------------------------------------------------------------------------------------------------------------------------------------------------------------------------------------|
| TI ("Pharmacists" OR "pharmacy technicians" OR "pharmac* technician" OR "pharmacist*" OR "clinic* pharmacist*" OR "pharmac* staff" OR "pharmacist*" OR "druggist*" OR "apothecary*" OR "hospital pharmacist*" OR "assistant pharmacist*" OR "commun* pharmacist*") OR AB ("Pharmacists" OR "pharmacy technicians" OR "pharmac* technician" OR "pharmacist*" OR "clinic*" OR "pharmacist*" OR "pharmac* staff" OR "pharmacist*" OR "druggist*" OR "apothecary*" OR "hospital pharmacist*" OR "assistant pharmacist*" OR "commun* pharmacist*")                                                                                                                                                                                                                                        |
| AND                                                                                                                                                                                                                                                                                                                                                                                                                                                                                                                                                                                                                                                                                                                                                                                  |
| TI ("Primary health care" OR "pharmaceutical services" OR "pharmac* servic*" OR "pharmac* car*" OR "pharmacist-managed clinic*" OR "pharmac* clinic for outpatient*" OR "Pharmac* clinic*" OR "outpatient pharmac* servic*") OR AB ("Primary health care" OR "pharmaceutical services" OR "pharmac* servic*" OR "pharmac* car*" OR "pharmacist-managed clinic*" OR "pharmac* clinic for outpatient*" OR "Pharmac* clinic*" OR "outpatient pharmac* servic*")                                                                                                                                                                                                                                                                                                                         |
| AND                                                                                                                                                                                                                                                                                                                                                                                                                                                                                                                                                                                                                                                                                                                                                                                  |
| TI ("Community health centers" OR "community health services" OR "primary care clinic*" OR "pharmacist-managed clinic*" OR "Community health servic*" OR "commun* health center*" OR "commun* hospital*" OR "general practice*" OR "community care setting*" OR "primary care setting*" OR "ambulatory care setting*" OR "family practice*" OR "clinic*" OR "medication review clinic*") OR AB ("Community health centers" OR "community health services" OR "primary care clinic*" OR "pharmacist-managed clinic*" OR "Community health servic*" OR "commun* health center*" OR "commun* hospital*" OR "general practice*" OR "community care setting*" OR "primary care setting*" OR "ambulatory care setting*" OR "family practice*" OR "clinic*" OR "medication review clinic*") |
| AND                                                                                                                                                                                                                                                                                                                                                                                                                                                                                                                                                                                                                                                                                                                                                                                  |
| TI ("Facilitator*" OR "Barrier*" OR "restrict*" OR "limit*" OR "difficult*" OR "factor*" OR "promot*" OR "ease") OR AB ("Facilitator*" OR "Barrier*" OR "restrict*" OR "limit*" OR "difficult*" OR "factor*" OR "promot*" OR "ease")                                                                                                                                                                                                                                                                                                                                                                                                                                                                                                                                                 |
| AND                                                                                                                                                                                                                                                                                                                                                                                                                                                                                                                                                                                                                                                                                                                                                                                  |
| TI (qualitative research OR qualitative study OR qualitative methods OR interview) OR AB (qualitative research OR qualitative study OR qualitative methods OR interview)                                                                                                                                                                                                                                                                                                                                                                                                                                                                                                                                                                                                             |

| PsycInfo                                                                                                                                                                                                                                                                                                                                                                                                                                                                                                                                                                                                                                                                                                                                                                             |
|--------------------------------------------------------------------------------------------------------------------------------------------------------------------------------------------------------------------------------------------------------------------------------------------------------------------------------------------------------------------------------------------------------------------------------------------------------------------------------------------------------------------------------------------------------------------------------------------------------------------------------------------------------------------------------------------------------------------------------------------------------------------------------------|
| TI ("Pharmacists" OR "pharmacy technicians" OR "pharmac* technician" OR "pharmacist*" OR "clinic* pharmacist*" OR "pharmac* staff" OR "pharmacist*" OR "druggist*" OR "apothecary*" OR "hospital pharmacist*" OR "assistant pharmacist*" OR "commun* pharmacist*") OR AB ("Pharmacists" OR "pharmacy technicians" OR "pharmac* technician" OR "pharmacist*" OR "clinic*" OR "pharmacist*" OR "pharmac* staff" OR "pharmacist*" OR "druggist*" OR "apothecary*" OR "hospital pharmacist*" OR "assistant pharmacist*" OR "commun* pharmacist*")                                                                                                                                                                                                                                        |
| AND                                                                                                                                                                                                                                                                                                                                                                                                                                                                                                                                                                                                                                                                                                                                                                                  |
| TI ("Primary health care" OR "pharmaceutical services" OR "pharmac* servic*" OR "pharmac* car*" OR "pharmacist-managed clinic*" OR "pharmac* clinic for outpatient*" OR "Pharmac* clinic*" OR "outpatient pharmac* servic*") OR AB ("Primary health care" OR "pharmaceutical services" OR "pharmac* servic*" OR "pharmac* car*" OR "pharmacist-managed clinic*" OR "pharmac* clinic for outpatient*" OR "Pharmac* clinic*" OR "outpatient pharmac* servic*")                                                                                                                                                                                                                                                                                                                         |
| AND                                                                                                                                                                                                                                                                                                                                                                                                                                                                                                                                                                                                                                                                                                                                                                                  |
| TI ("Community health centers" OR "community health services" OR "primary care clinic*" OR "pharmacist-managed clinic*" OR "Community health servic*" OR "commun* health center*" OR "commun* hospital*" OR "general practice*" OR "community care setting*" OR "primary care setting*" OR "ambulatory care setting*" OR "family practice*" OR "clinic*" OR "medication review clinic*") OR AB ("Community health centers" OR "community health services" OR "primary care clinic*" OR "pharmacist-managed clinic*" OR "Community health servic*" OR "commun* health center*" OR "commun* hospital*" OR "general practice*" OR "community care setting*" OR "primary care setting*" OR "ambulatory care setting*" OR "family practice*" OR "clinic*" OR "medication review clinic*") |
| AND                                                                                                                                                                                                                                                                                                                                                                                                                                                                                                                                                                                                                                                                                                                                                                                  |
| TI ("Facilitator*" OR "Barrier*" OR "restrict*" OR "limit*" OR "difficult*" OR "factor*" OR "promot*" OR "ease") OR AB ("Facilitator*" OR "Barrier*" OR "restrict*" OR "limit*" OR "difficult*" OR "factor*" OR "promot*" OR "ease")                                                                                                                                                                                                                                                                                                                                                                                                                                                                                                                                                 |
| AND                                                                                                                                                                                                                                                                                                                                                                                                                                                                                                                                                                                                                                                                                                                                                                                  |
| TI (qualitative research OR qualitative study OR qualitative methods OR interview) OR AB (qualitative research OR qualitative study OR qualitative methods OR interview)                                                                                                                                                                                                                                                                                                                                                                                                                                                                                                                                                                                                             |

| WOS                                                                                                                                                                                                                                                                                                                                                                                                                                                                                                                                                                                                                                                                                                                                                                                    |
|----------------------------------------------------------------------------------------------------------------------------------------------------------------------------------------------------------------------------------------------------------------------------------------------------------------------------------------------------------------------------------------------------------------------------------------------------------------------------------------------------------------------------------------------------------------------------------------------------------------------------------------------------------------------------------------------------------------------------------------------------------------------------------------|
| (TI=(“Pharmacists” OR “pharmacy technicians” OR “pharmac* technician” OR “pharmacist*” OR “clinic* pharmacist*” OR “pharmac* staff” OR “pharmacist*” OR “druggist*” OR “apothecary*” OR “hospital pharmacist*” OR “assistant pharmacist*” OR “commun* pharmacist*”) OR AB=(“Pharmacists” OR “pharmacy technicians” OR “pharmac* technician” OR “pharmacist*” OR “clinic* pharmacist*” OR “pharmac* staff” OR “pharmacist*” OR “druggist*” OR “apothecary*” OR “hospital pharmacist*” OR “assistant pharmacist*” OR “commun* pharmacist*”))                                                                                                                                                                                                                                             |
| AND                                                                                                                                                                                                                                                                                                                                                                                                                                                                                                                                                                                                                                                                                                                                                                                    |
| (TI=(“Primary health care” OR “pharmaceutical services” OR “pharmac* servic*” OR “pharmac* car*” OR “pharmacist-managed clinic*” OR “pharmac* clinic for outpatient*” OR “Pharmac* clinic*” OR “outpatient pharmac* servic*”) OR AB=(“Primary health care” OR “pharmaceutical services” OR “pharmac* servic*” OR “pharmac* car*” OR “pharmacist-managed clinic*” OR “pharmac* clinic for outpatient*” OR “Pharmac* clinic*” OR “outpatient pharmac* servic*”))                                                                                                                                                                                                                                                                                                                         |
| AND                                                                                                                                                                                                                                                                                                                                                                                                                                                                                                                                                                                                                                                                                                                                                                                    |
| (TI=(“Community health centers” OR “community health services” OR “primary care clinic*” OR “pharmacist-managed clinic*” OR “Community health servic*” OR “commun* health center*” OR “commun* hospital*” OR “general practice*” OR “community care setting*” OR “primary care setting*” OR “ambulatory care setting*” OR “family practice*” OR “clinic*” OR “medication review clinic*”) OR AB=(“Community health centers” OR “community health services” OR “primary care clinic*” OR “pharmacist-managed clinic*” OR “Community health servic*” OR “commun* health center*” OR “commun* hospital*” OR “general practice*” OR “community care setting*” OR “primary care setting*” OR “ambulatory care setting*” OR “family practice*” OR “clinic*” OR “medication review clinic*”)) |
| AND                                                                                                                                                                                                                                                                                                                                                                                                                                                                                                                                                                                                                                                                                                                                                                                    |
| (TI=(“Facilitator*” OR “Barrier*” OR “restrict*” OR “limit*” OR “difficult*” OR “factor*” OR “promot*” OR “ease”) OR AB=(“Facilitator*” OR “Barrier*” OR “restrict*” OR “limit*” OR “difficult*” OR “factor*” OR “promot*” OR “ease”))                                                                                                                                                                                                                                                                                                                                                                                                                                                                                                                                                 |
| AND                                                                                                                                                                                                                                                                                                                                                                                                                                                                                                                                                                                                                                                                                                                                                                                    |
| (TI=(qualitative research OR qualitative study OR qualitative methods OR interview) OR AB=(qualitative research OR qualitative study OR qualitative methods OR interview))                                                                                                                                                                                                                                                                                                                                                                                                                                                                                                                                                                                                             |

| CNKI                                                                                                                                                                                                                                                                                                                                                                                                                           |
|--------------------------------------------------------------------------------------------------------------------------------------------------------------------------------------------------------------------------------------------------------------------------------------------------------------------------------------------------------------------------------------------------------------------------------|
| (TI=('门诊药学服务'+ '初级卫生保健'+ '基层卫生保健'+ '基层卫生服务'+ '基层医疗'+ '初级医疗'+ '初级保健诊所'+ '初级保健场所'+ '药学门诊'+ '初级保健场所'+ '社区卫生服务中心'+ '社区健康服务中心'+ '社区卫生服务站'+ '社康中心'+ '社区医院'+ '社区门诊'+ '卫生院'+ '卫生室'+ '基层医疗机构'+ '基层医院'+ '家庭医疗'+ '社区药房') OR AB=('门诊药学服务'+ '初级卫生保健'+ '基层卫生保健'+ '基层卫生服务'+ '基层医疗'+ '初级医疗'+ '初级保健诊所'+ '初级保健场所'+ '药学门诊'+ '初级保健场所'+ '社区卫生服务中心'+ '社区健康服务中心'+ '社区卫生服务站'+ '社康中心'+ '社区医院'+ '社区门诊'+ '卫生院'+ '卫生室'+ '基层医疗机构'+ '基层医院'+ '家庭医疗'+ '社区药房')) |
| AND                                                                                                                                                                                                                                                                                                                                                                                                                            |
| (TI=('药师'+ '药学人员'+ '药剂师'+ '药学技术人员'+ '药士'+ '药剂员') OR AB=('药师'+ '药学人员'+ '药剂师'+ '药学技术人员'+ '药士'+ '药剂员'))                                                                                                                                                                                                                                                                                                                           |
| AND                                                                                                                                                                                                                                                                                                                                                                                                                            |
| (TI=('因素'+ '分析'+ '预测'+ '情况'+ '现况'+ '现状'+ '质性研究'+ '定性研究'+ '访谈'+ '建议'+ '主题分析'+ '扎根理论'+ '困难'+ '挑战') OR AB=('因素'+ '分析'+ '预测'+ '情况'+ '现况'+ '现状'+ '质性研究'+ '定性研究'+ '访谈'+ '建议'+ '主题分析'+ '扎根理论'+ '困难'+ '挑战'))                                                                                                                                                                                                                           |

| Wanfang                                                                                                                                                                                                                                                                                                                                                                                                                                                                                                                                                        |
|----------------------------------------------------------------------------------------------------------------------------------------------------------------------------------------------------------------------------------------------------------------------------------------------------------------------------------------------------------------------------------------------------------------------------------------------------------------------------------------------------------------------------------------------------------------|
| (题名:(“门诊药学服务” OR “初级卫生保健” OR “基层卫生保健” OR “基层卫生服务” OR “基层医疗” OR “初级医疗” OR “初级保健诊所” OR “初级保健场所” OR “药学门诊” OR “初级保健场所” OR “最初保健护理” OR “社区卫生服务中心” OR “社区健康服务中心” OR “社区卫生服务站” OR “社康中心” OR “社区医院” OR “社区门诊” OR “卫生院” OR “卫生室” OR “基层医疗机构” OR “基层医院” OR “基层医院” OR “家庭医疗” OR “社区药房”) or 摘要:(“门诊药学服务” OR “初级卫生保健” OR “基层卫生保健” OR “基层卫生服务” OR “基层医疗” OR “初级医疗” OR “初级保健诊所” OR “初级保健场所” OR “药学门诊” OR “初级保健场所” OR “最初保健护理” OR “社区卫生服务中心” OR “社区健康服务中心” OR “社区卫生服务站” OR “社康中心” OR “社区医院” OR “社区门诊” OR “卫生院” OR “卫生室” OR “基层医疗机构” OR “基层医院” OR “基层医院” OR “家庭医疗” OR “社区药房”)) |
| and                                                                                                                                                                                                                                                                                                                                                                                                                                                                                                                                                            |
| (题名:(“药师” OR “药学人员” OR “药剂师” OR “药学技术人员” OR “药士”OR “药剂员”) or 摘要:(“药师” OR “药学人员” OR “药剂师” OR “药学技术人员” OR “药士”OR “药剂员”))                                                                                                                                                                                                                                                                                                                                                                                                                                         |
| and                                                                                                                                                                                                                                                                                                                                                                                                                                                                                                                                                            |
| (题名:(“因素”OR“分析”OR“预测”OR“情况”OR“现况”OR“现状”OR“质性研究”OR“定性研究”OR“访谈”OR“建议”OR“主题分析”OR“扎根理论”OR“困难”OR“挑战”) or 摘要:(“因素”OR“分析”OR“预测”OR“情况”OR“现况”OR“现状”OR“质性研究”OR“定性研究”OR“访谈”OR“建议”OR“主题分析”OR“扎根理论”OR“困难”OR“挑战”))                                                                                                                                                                                                                                                                                                                                                           |

| sources                                             | website                                                               | Search key words                                                                                                                                                                                                                                                           |
|-----------------------------------------------------|-----------------------------------------------------------------------|----------------------------------------------------------------------------------------------------------------------------------------------------------------------------------------------------------------------------------------------------------------------------|
| World Health Organization                           | <a href="https://www.who.int/">https://www.who.int/</a>               | Pharmacist; community pharmacist; Primary care; primary health care; pharmaceutical services; pharmacist-managed clinic; outpatient pharmaceutical services; community health services; Facilitator; Barrier; Restriction; limitation; difficulty; factor; promotion; ease |
| American Pharmacists Association                    | <a href="https://www.pharmacist.com/">https://www.pharmacist.com/</a> |                                                                                                                                                                                                                                                                            |
| Google Scholar                                      | <a href="https://scholar.google.com/">https://scholar.google.com/</a> |                                                                                                                                                                                                                                                                            |
| New York Academy of Medicine Grey Literature Report | <a href="http://www.greylit.org/">http://www.greylit.org/</a>         |                                                                                                                                                                                                                                                                            |
| 百度学术                                                | <a href="https://xueshu.baidu.com/">https://xueshu.baidu.com/</a>     | 门诊药学服务; 初级卫生保健; 基层医疗; 初级保健诊所; 药学门诊; 社区卫生服务中心; 社区健康服务中心; 社区卫生服务站; 社康中心; 基层医疗机构; 社区药房; 药师; 药学技术人员                                                                                                                                                                            |
| 中华人民共和国国家卫生健康委员会                                    | <a href="http://www.nhc.gov.cn/">http://www.nhc.gov.cn/</a>           |                                                                                                                                                                                                                                                                            |
| 中国药师协会                                              | <a href="http://www.clponline.cn/">http://www.clponline.cn/</a>       |                                                                                                                                                                                                                                                                            |
